# Supplementary material
Source: PubMed Central journal article supplement (PMC8114926)
Supplement: 41422_2020_411_MOESM1_ESM.pdf [file 41422_2020_411_MOESM1_ESM.pdf]

## **Supplementary Information**

**Title: LRP6 downregulation promotes cardiomyocyte proliferation  
and heart regeneration**

**This file includes:**

Supplementary information, Figs. S1-S19

Supplementary information, Tables S1-S2

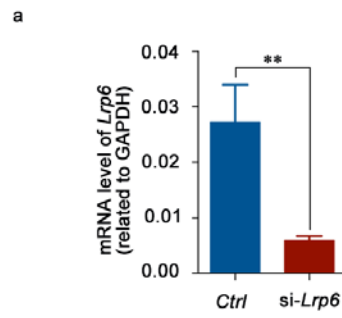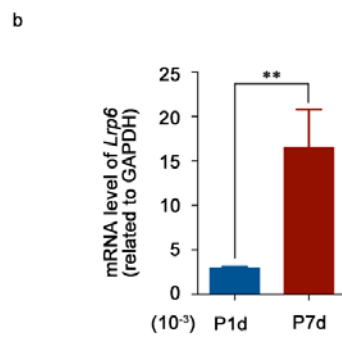

**Supplementary information, Fig. S1. *Lrp6* mRNA expression.** **a** qRT-PCR results showing the successful knockdown of *Lrp6* in NRCMs using *Lrp6* siRNA.  $n = 3$  experiments. **b** *Lrp6* mRNA level in P1d and P7d mouse hearts.  $n = 3$  mice per group.  $**P < 0.01$ . Data are presented as means  $\pm$  SD.
