# Supplementary material
Source: PubMed Central journal article supplement (PMC8114926)
Supplement: 41422_2020_411_MOESM3_ESM.pdf [file 41422_2020_411_MOESM3_ESM.pdf]

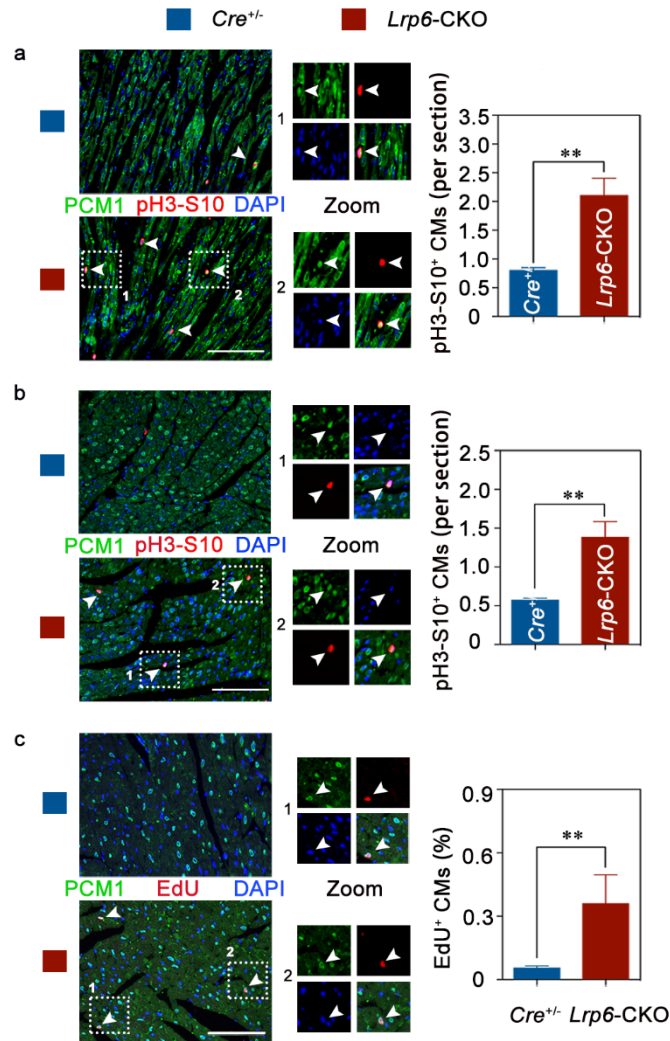

**Supplementary information, Fig. S3. *Lrp6* deficiency promotes cardiomyocyte proliferation in the mouse hearts at different stages.** **a, b** Immunostaining showing the colocalization of pH3-S10, PCM1 and DAPI in the *Lrp6*-CKO and *Cre*<sup>+/-</sup> hearts at P7d and P14d. **c** Immunostaining showing the colocalization of EdU, PCM1 and DAPI in the *Lrp6*-CKO and *Cre*<sup>+/-</sup> hearts at P10w. The cardiomyocyte nuclei were stained positive for PCM1. White arrowheads indicate the EdU<sup>+</sup> or pH3-S10<sup>+</sup> cardiomyocytes. The individual staining for pH3-S10 (**a,b**), EdU (**c**) and PCM1 was shown in zoom regions. Quantitative analysis of the pH3-S10<sup>+</sup> or EdU<sup>+</sup> cardiomyocytes via counting in multiple sections from three independent samples per group (3 sections per heart). Scale bar = 100  $\mu$ m. \*\* $P < 0.01$ . Data are presented as means  $\pm$  SD.
