# Supplementary material
Source: PubMed Central journal article supplement (PMC8114926)
Supplement: 41422_2020_411_MOESM5_ESM.pdf [file 41422_2020_411_MOESM5_ESM.pdf]

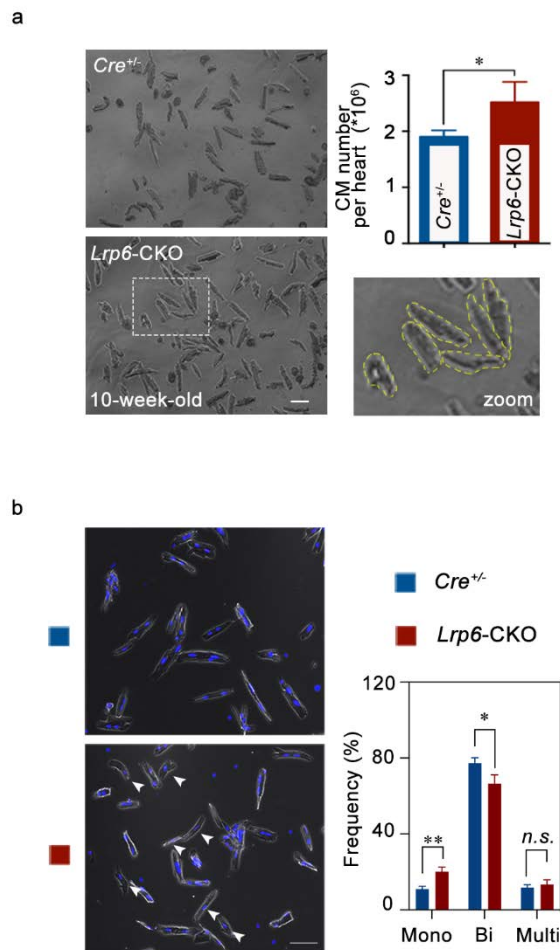

**Supplementary information, Fig. S5. Representative images and quantification of the nucleation of rod-shaped cardiomyocytes isolated from adult *Cre*<sup>+/-</sup> and *Lrp6*-CKO hearts.** Approximately  $2-3 \times 10^6$  cardiomyocytes per sample were counted in 3 independent samples using an automated cell counter (**a**). Scale bar = 100  $\mu\text{m}$ . **b** Immunostaining of isolated cardiomyocytes with DAPI, and quantification of the number of nuclei in *Cre*<sup>+/-</sup> and *Lrp6*-CKO hearts. For nucleation, approximately 7000-9000 cells were counted from 4 mice per group (right). White arrowheads indicate the mononucleated cardiomyocytes. Mono, mononucleated CMs, Bi, binucleated CMs, Multi, multinucleated CMs. Scale bar = 75  $\mu\text{m}$ . \* $P < 0.05$ , \*\* $P < 0.01$ . *n.s.*, not significant. Data are presented as means  $\pm$  SD.
