# Supplementary material
Source: PubMed Central journal article supplement (PMC8114926)
Supplement: 41422_2020_411_MOESM6_ESM.pdf [file 41422_2020_411_MOESM6_ESM.pdf]

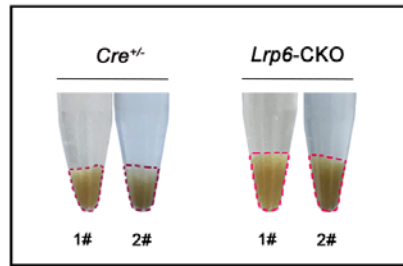

**Supplementary information, Fig. S6. Whole mounts of cardiomyocytes isolated from *Cre*<sup>+/-</sup> and *Lrp6*-CKO hearts at 10 weeks.**
