# Supplementary material
Source: PubMed Central journal article supplement (PMC8114926)
Supplement: 41422_2020_411_MOESM8_ESM.pdf [file 41422_2020_411_MOESM8_ESM.pdf]

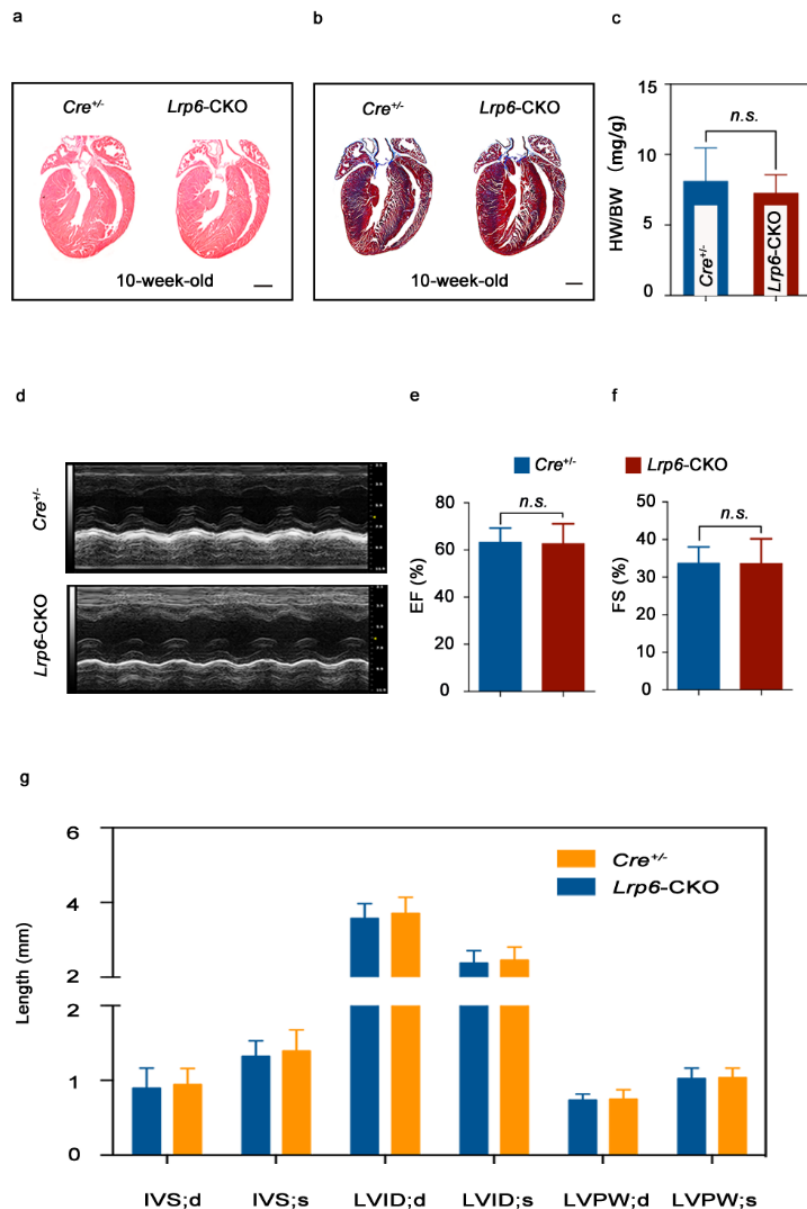

**Supplementary information, Fig. S8. Heart morphology and cardiac function in adult *Cre*<sup>+/-</sup> and *Lrp6*-CKO mice.** **a, b** H&E staining and Masson's trichrome staining of the *Cre*<sup>+/-</sup> and *Lrp6*-CKO hearts at 10 weeks. Scale bar = 1 mm. **c** The heart weight (HW) to body weight (BW) ratio of the *Cre*<sup>+/-</sup> and *Lrp6*-CKO hearts at 10 weeks. *n* = 7 mice per group. **d-g** Echocardiographic measurements of several cardiac function parameters, including diastolic interventricular septal thickness (IVS;d), systolic interventricular septal thickness (IVS;s), diastolic left ventricular diameter (LVID;d), systolic left ventricular diameter (LVID;s), diastolic left ventricular posterior wall thickness (LVPW;d), and systolic left ventricular posterior wall thickness (LVPW;s). *n* = 25 mice per group. *n.s.*, not significant. Data are presented as means ± SD.
