# Supplementary material
Source: PubMed Central journal article supplement (PMC8114926)
Supplement: 41422_2020_411_MOESM9_ESM.pdf [file 41422_2020_411_MOESM9_ESM.pdf]

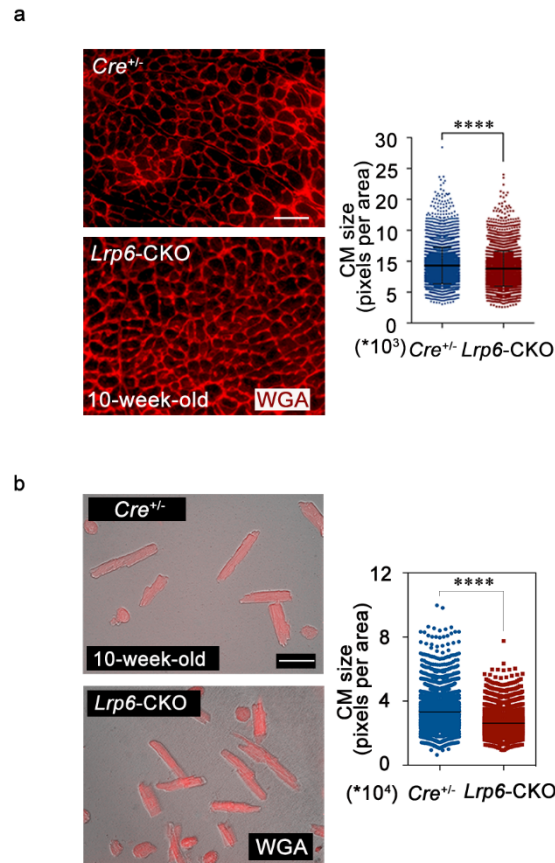

**Supplementary information, Fig. S9. Wheat germ agglutinin (WGA) staining and cell size quantification of the *Lrp6*-CKO and *Cre*<sup>+/-</sup> cardiomyocytes at P10w.** **a** Quantitative analysis were performed by counting within multiple fields from three independent samples per group (4000 cells per group from 7-8 independent samples). Scale bar = 50  $\mu$ m. **b** Quantitative analysis was performed by counting isolated CMs within multiple fields from three independent samples per group (2000-3000 cells per group from three independent samples). Scale bar = 100  $\mu$ m. \*\*\*\* $P < 0.0001$ . Data are presented as means  $\pm$  SD.
