# Supplementary material
Source: PubMed Central journal article supplement (PMC8114926)
Supplement: 41422_2020_411_MOESM14_ESM.pdf [file 41422_2020_411_MOESM14_ESM.pdf]

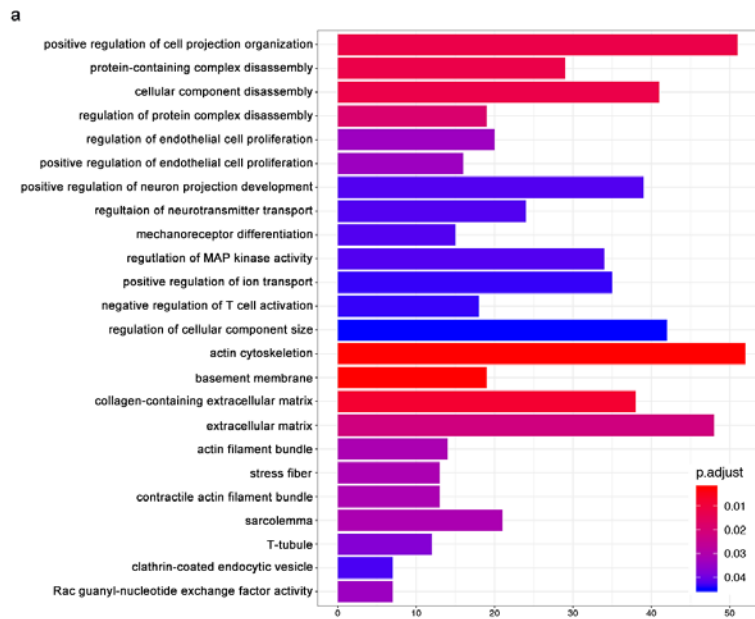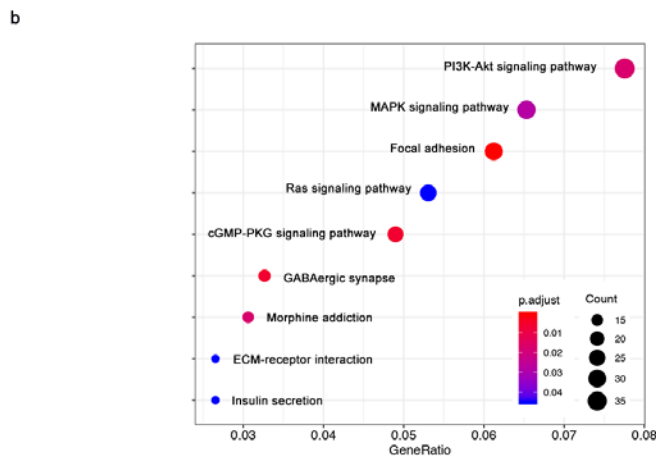

**Supplementary information, Fig. S14. RNA-seq analysis of cardiomyocytes from adult *Lrp6*-CKO and *Cre*<sup>+/-</sup> hearts. a** Gene ontology (GO) classification of differentially expressed genes in the *Cre*<sup>+/-</sup> and *Lrp6*-CKO cardiomyocytes. Significant GO terms are shown. **b** Scatter plot for KEGG enrichment results: *Cre*<sup>+/-</sup> cardiomyocytes versus *Lrp6*-CKO cardiomyocytes. *n* = 2-3 mice per group.
