# Supplementary material
Source: PubMed Central journal article supplement (PMC8114926)
Supplement: 41422_2020_411_MOESM16_ESM.pdf [file 41422_2020_411_MOESM16_ESM.pdf]

a

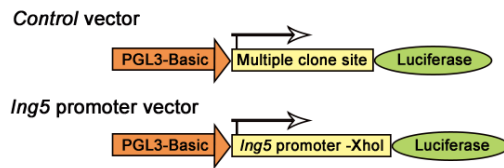

b

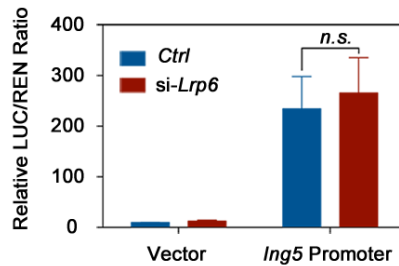

**Supplementary information, Fig. S16. Luciferase assay to examine the effect of LRP6 on *Ing5* transcription.** **a** Schematic diagram of the luciferase reporter vector containing the *Ing5* promoter. **b** Quantification analysis of relative luciferase values in LRP6-deficient and control NRCMs which were transfected with an *Ing5* promoter-reporter gene construct for 24 h before activity measurement.  $n = 3$  experiments. *n.s.*: not significant. Data are presented as the mean  $\pm$  SD.
