# Supplementary material
Source: PubMed Central journal article supplement (PMC8114926)
Supplement: 41422_2020_411_MOESM20_ESM.pdf [file 41422_2020_411_MOESM20_ESM.pdf]

**Supplementary information, Table S1. siRNAs sequences list.**

| <b>Gene</b>    | <b>Sequences (5' to 3')</b>                    |
|----------------|------------------------------------------------|
| <i>Lrp6</i>    | GGCAGACACAGGAACAAAUTT<br>AUUUGUUCCUGUGUCUGCCTT |
| <i>Ing5</i>    | GAAAGCAGAGAUCGACAUUTT<br>AAUGUCGAUCUCUGCUUUCTT |
| <i>Aldh7a1</i> | CCAAGAAAGCUUGGAACAUTT<br>AUGUUGCAAGCUUUCUUGGTT |
| <i>Acot7</i>   | GGUGCCUCCUAUUGUGUAUTT<br>AUACACAAUAGGAGGCACCTT |
| <i>Spred1</i>  | GCUACGUCCCUUUGAGAAUTT<br>AUUCUCAAGGGACGUAGCTT  |
| <i>Spred2</i>  | CCAUUGGAAGGUUGAUAAUTT<br>AUUAUCAACCUUCCAAUGGTT |
